# Developmental Genome-Wide DNA Methylation Asymmetry Between Mouse Placenta and Embryo

Legault LM<sup>1,2</sup>, Doiron K<sup>1</sup>, Lemieux A<sup>1,2</sup>, Caron M<sup>1,3</sup>, Chan D<sup>3</sup>, Lopes FL<sup>4</sup>, Bourque G<sup>5,6,7</sup>,  
Sinnott D<sup>1,8</sup>, McGraw S<sup>1,2,9, #</sup>.

<sup>1</sup>Research Center of the CHU Sainte-Justine, Montreal, Canada.

<sup>2</sup>Department of Biochemistry and Molecular Medicine, Université de Montréal, Montreal, Canada.

<sup>3</sup>Research Institute of the McGill University Health Centre, Montreal, Quebec, Canada

<sup>4</sup>São Paulo State University (Unesp), School of Veterinary Medicine, Aracatuba, Brazil

<sup>5</sup>Department of Human Genetics, McGill University, Montreal, Quebec, Canada

<sup>6</sup>McGill University and Genome Quebec Innovation Centre, Montreal, Quebec, Canada

<sup>7</sup>Canadian Center for Computational Genomics, Montreal, Quebec, Canada

<sup>8</sup>Department of Pediatrics, Université de Montréal, Montreal, Canada.

<sup>9</sup>Department of Obstetrics and Gynecology, Université de Montréal, Montreal, Canada.

#Corresponding author: serge.mcgraw@umontreal.ca

**Running title:** Embryonic & Placental DNAm Asymmetry

**Summary statement:** The kinetics of asymmetric DNA methylation acquisition of embryo-placenta differentially methylated regions is not a stepwise process occurring in embryonic and extraembryonic lineages, but a prompt progression in the early post-implanted conceptus.

# ABSTRACT

In early embryos, DNA methylation is remodelled to initiate the developmental program but for mostly unknown reasons, methylation marks are acquired unequally between embryonic and placental cells. To better understand this, we generated high-resolution DNA methylation maps of mouse mid-gestation (E10.5) embryo and placenta. We uncovered specific subtypes of differentially methylated regions (DMRs) that contribute directly to the developmental asymmetry existing between mid-gestation embryonic and placental DNA methylation patterns. We show that the asymmetry occurs rapidly during the acquisition of marks in the post-implanted conceptus (E3.5-E6.5), and that these patterns are long-lasting across subtypes of DMRs throughout prenatal development and in somatic tissues. We reveal that at the peri-implantation stages, the *de novo* methyltransferase activity of DNMT3B is the main driver of methylation marks on asymmetric DMRs, and that DNMT3B can largely compensate for lack of DNMT3A in the epiblast and extraembryonic ectoderm, whereas DNMT3A can only partially palliate in the absence of DNMT3B. However, as development progresses and as DNMT3A becomes the principal *de novo* methyltransferase, the compensatory DNA methylation mechanism of DNMT3B on DMRs becomes less effective.

# INTRODUCTION

Throughout the eutherian mammalian gestation, the placenta plays an essential role in mediating maternal–embryonic exchanges of gas, nutrients and waste, and also provides the developing embryo with a protective layer against adverse environmental exposures and the maternal immune system (Rossant and Cross, 2001). These unique placental functions are orchestrated by several distinct trophoblast cell subtypes organized in separate layers (Cross, 2000). The initial steps of lineage specialization of both placental and embryonic cells occur promptly following fertilization during the first few embryonic cleavages as DNA methylation marks are being reprogrammed (Morgan et al., 2005).

DNA methylation is an epigenetic mechanism that is critical in the determination of lineage-specific differentiation and development, and is mainly recognized for its involvement in processes such as transcriptional repression, genomic imprinting and X-inactivation (Bestor, 2000). DNA methylation marks are mediated by the action of DNA methyltransferases (DNMTs). Establishment of new or *de novo* DNA methylation patterns required for cell lineage determination during development is mediated by DNMT3A and DNMT3B, with cofactor DNMT3L, (Okano et al., 1999, Li, 2002), whereas DNMT1 maintains heritable DNA methylation patterns during cellular divisions (Leonhardt et al., 1992, Lei et al., 1996). These enzymes are critical, as deletion of *Dnmt3b* or *Dnmt1* is embryonic lethal, while *Dnmt3a*-deficient offspring die shortly after birth (Li et al., 1992, Okano et al., 1999). During gametogenesis, the acquisition of genome-wide and allele-specific methylation patterns (i.e. genomic imprinting) in both oocytes and sperm is essentially due to the activity of DNMT3A (Kaneda et al., 2004, Kato et al., 2007). Following fertilization, a reprogramming wave removes most methylation signatures across the genome, except for imprinted regions, some types of repeat sequences, as well as imprinted-like sequences, to trigger the developmental program (Hirasawa et al., 2008, Howell et al., 2001, McGraw et al., 2015). Then, during the peri-implantation process, DNA methylation profiles are re-acquired in a sex-, cell- and tissue-specific manner across most parts of the genome by the combined action of DNMT3A and DNMT3B. In the early stages of the *de novo* methylation wave (E4.5-E7.5), the expression of *Dnmt3b* is more robust than *Dnmt3a* in the epiblast and embryonic-derived cells (Watanabe et al., 2002, Auclair et al., 2014, Smith et al., 2017), with the relative expression of *Dnmt3b* and *Dnmt3a* being considerably reduced in the extraembryonic ectoderm (ExE) and trophoblast

lineages (Smith et al., 2017, Senner et al., 2012). This discrepancy in *Dnmt3a* and *Dnmt3b* expression levels coincides with the initiation of divergent DNA methylation acquisition between the trophoblast and the inner cell mass of the blastocyst (Monk, 1987, Nakanishi et al., 2012, Oda et al., 2013, Santos et al., 2002, Fulka et al., 2004, Guo et al., 2014, Smith et al., 2014), a difference that becomes extremely apparent by E6.5, as the epiblast has acquired most of its global DNA methylation compared to the lower-methylation state of the ExE (Auclair et al., 2014, Smith et al., 2017). This divergence is a common feature across mammalian placenta, as a heterogeneous and lower-methylation state compared to somatic tissues and other cell types is constantly observed (Smith et al., 2017, Decato et al., 2017, Schroeder et al., 2013, Chatterjee et al., 2016).

Although the functional role of reduced methylation levels observed across the placental genome is still not fully understood, studies suggest that it may activate transposable elements that are typically silenced in other tissues (Chuong, 2013). DNA methylation plays an important role in suppressing retrotransposons in mammalian cells, for which the activity has been associated with genomic instability and disease development (Church et al., 2009, Slotkin and Martienssen, 2007). Following the *de novo* methylation wave, in embryonic-derived cells from the inner cell mass, transposable elements acquire higher levels of DNA methylation causing transcriptional silencing, whereas in the trophectoderm-derived cells that will form the placenta, these transposable elements are maintained in a relaxed methylation state and preferentially expressed (Price et al., 2012, Okahara et al., 2004, Warren et al., 2015). The low-methylation levels on these elements contributed to the evolution and diversification of the placenta function through the regulation of gene expression by providing placenta-specific enhancers, cryptic promoters and other cis-regulatory elements (Haig, 2012, Mi et al., 2000, Cohen et al., 2011, Xie et al., 2013, Macaulay et al., 2011, Emera and Wagner, 2012).

Despite the evident distinction between embryonic and placental DNA methylation levels, it remains unclear how, when and where methylation levels are acquired unequally across these genomes. To better understand the developmental dynamics of epigenetic asymmetry that exists between embryo and placenta, we first generated high-resolution maps of DNA methylation marks using Reduced Representation Bisulfite Sequencing (RRBS) at mid-gestation, when the mouse placenta is first considered mature (E10.5), to identify embryo-placenta differentially methylated regions (DMRs). Then, using publicly available DNA methylation data

sets and computational analyses, we defined how various categories of DMRs are established in early stages and maintained throughout development. In addition, we outlined the contribution of *Dnmt3a* and *Dnmt3b* in the acquisition and maintenance of embryonic and extraembryonic specific DMR patterns.

# **METHODS**

## ***Animals and Sample Collection***

Female C57BL/6 (8-10 week-old) were purchased from Harlan Sprague-Dawley Laboratories (Indianapolis, IN) and were mated with male C57BL/6 (4 months of age). Following natural mating, embryos and placental tissues were collected at E10.5 (presence of vaginal plug at E0.5). Samples were frozen immediately in liquid nitrogen and stored at -80 °C until analyzed.

## ***DNA Methylation Analyses***

RRBS libraries were generated as published protocols (Boyle et al., 2012, Gu et al., 2011) with our specifications (Magnus et al., 2014, McGraw et al., 2015, Legault et al., 2019). 500 ng of extracted DNA (Qiagen) from placenta (male n=2, female n=2) and embryo (male n=2, female n=2) samples was *MspI* digested, adaptor ligated and PCR amplified (multiplex). Multiplexed samples were pooled and 100 bp paired-end sequenced (HiSeq-2000, Illumina). The data analyses were done according to the pipeline established at the McGill Epigenomics Mapping and Data Coordinating Centers (Magnus et al., 2014, McGraw et al., 2015) that include BSMAP and methylKit. Specific parameters were chosen including 100 bp step-wise tiling windows, containing a minimum of 2 CpGs per tile and a minimum 15× CpG coverage of each tile per sample. The methylation level of a 100-bp tile was the result of all CpG C/T read counts within the tile after coverage normalization between samples, and the methylation level reported for a sample on autosomal chromosomes was the average methylation level across replicates. Significant DNA methylation changes were designated as  $\pm \geq 20\%$  average differences between groups of replicates and a q-value < 0.01 using the logistic regression function of methylKit (Akalin et al., 2012). Direct comparisons between DNA methylation averages were done using Wilcoxon-Mann-Whitney test in R. Gene ontology (GO) terms and pathway analyses for

RefSeqs associated to promoter-TSS were conducted using Metascape gene annotation and analysis resource (Zhou et al., 2019).

## ***Sequencing Data***

Publicly available DNA methylation data sets (Auclair et al., 2014, Decato et al., 2017, Smith et al., 2014, Smith et al., 2017, Whidden et al., 2016, Hon et al., 2013) were analyzed using a custom script to intersect single CpG site methylation calls from these data sets within defined 100bp tiles associated to the embryo-placenta DMRs categories

## **RESULTS**

### ***Increased Fluctuation in Genome-Wide DNA Methylation Levels in Placental Cells***

To identify the overall epigenetic asymmetry that exists between placental and embryonic genomes during mouse *in utero* development, we first established genome-wide DNA methylation profiles using RRBS (McGraw et al., 2015, Magnus et al., 2014, Legault et al., 2019) of embryos and their corresponding placentas at mid-gestation (E10.5), the developmental stage at which the mouse placenta is considered mature (Cross et al., 1994). Using this approach, we quantified the DNA methylation profiles of ~1.8 million CpG sites in each sample (embryo n=4, placenta n=4). We found that the accumulation of CpG methylation was very distinct between the placenta and the embryo. In the placenta, we detected a greater proportion of CpGs in the 0-50% methylation range and a lower proportion of CpGs in the 80-100% methylation range (Figure 1A). Although we observed that a large proportion of CpGs within the examined regions had no methylation marks in both the embryo and the placenta, interestingly, most CpGs with partial methylation (20-50%) in placenta showed high methylation levels (>80%) in embryos (Figure 1B). The divergence in global DNA methylation profiles conferred a high degree of clustering between both tissue types (Figure S1). These results are consistent with previous studies indicating lower levels of overall DNA methylation in extraembryonic tissues (Price et al., 2012, Schroeder et al., 2013, Smith et al., 2017), reviewed in (Robinson and Price, 2015).

To further investigate the dynamics of DNA methylation between placental and embryonic genomes and enable direct comparison of precise regions, we segmented the genome of autosomal chromosomes into 100bp non-overlapping genomic windows (*tiles*; see methods

section). After removal of sex chromosomes, we identified 245 048 unique sequenced tiles (referred to as All-tiles) containing 896 820 common CpGs between all placenta and embryo samples and with a minimum of 15x sequencing depth. We observed a strong reduction in the fraction of highly methylated tiles (80-100%) in the placenta compared to the embryo (Figure 1C), which correlated with a sharp increase in the number of placenta tiles in the 0-20%, 20-40% and 40-60% methylation range. Globally, we found that the average DNA methylation level across all placental tiles was significantly lower compared to all embryo tiles (27% vs 45%,  $p < 0.0001$ ) (Figure 1C). This overall epigenetic disparity in embryo and placenta DNA methylation levels was especially noticeable when we mapped the methylation mean of All-tiles with respect to regions surrounding the transcription start sites (TSS) (Figure 1D). When we focused on a specific chromosome section (e.g., chr 7, 35Mb) (Figure 1E), we observed that genomic segments with high DNA methylation levels in embryos were predominantly hypomethylated in placenta. We also observed that gene or CpG island (CGI) poor regions had consistently high methylation levels in embryos and lower methylation levels in the placenta. Together, these results indicate that the mid-gestation placenta has very distinctive global DNA methylation profiles compared to the embryo, and that this lower level of global DNA methylation (i.e., DNA hypomethylation) across the placental genome is due to a significant lower number of highly methylated ( $\geq 80\%$ ) genomic regions. We can also conclude that despite the cellular heterogeneity in E10.5 placental and embryonic tissues, the vast majority of the conceptus possesses specific genomic regions with either low (0-20%) or high (80-100%) levels of methylation. However, the placenta genome presents an increased number of regions having a broader distribution of DNA methylation (20-80%), revealing a greater diversity in methylation levels across placental cell types compared to embryonic cell types.

### ***Embryonic and Placental DNA Methylation Divergences Across Genomic Features***

To explain the developmentally divergent methylated states between the mouse embryo and the placenta, we next sought to precisely determine the genomic features revealing DNA methylation differences. We defined differentially methylated regions (DMRs) as 100bp genomic segments showing a significant difference of methylation levels between embryonic and placental samples with an absolute mean methylation difference of 20% or higher (McGraw et al., 2015, Shaffer et al., 2015, Piche et al., 2019). Using these conditions, we screened the 245



048 unique tiles common between all samples and identified 110 240 DMRs (~45% of All-tiles; Supplementary Table 1) with tissue- and/or developmental-specific DNA methylation variations between the embryo and the placenta (Figure 2A; random subset of 20,000 DMRs shown). Consistent with our findings (Figure 1), the majority (96.8%; n=106 712) of DMRs had lower DNA methylation in the placenta (referred to as Hypo-DMRs) and only a small proportion (3.2%; n=3 528) showed increased methylation levels (referred to as Hyper-DMRs) compared to the embryo (Figure S2). For Hypo-DMRs, tiles mainly overlapped (96%; n=102 982) with intergenic, intron, exon and promoter-TSS regions (Figure S2). For each of the genomic feature categories of Hypo-DMRs, the average DNA methylation levels in the placenta were essentially half of those present in the embryo (Figure 2B). As for DMRs with higher methylation levels in the placenta (Hyper-DMRs), we noticed that the vast majority of these tiles (83%; n=2 929) had very low methylation levels in the embryo (<20%) (Figure 2A-B). Most of Hyper-DMRs overlapped intergenic, intron, exon and promoter-TSS regions (93%; n=3 272, Figure S2). We then investigated the relationship between gene expression and DMR DNA methylation levels. Highly expressed genes in placental tissue such as *Syna* (*Syncytin A*) (Mi et al., 2000) showed overall lower methylation levels in the placenta when compared to the embryo (Figure 2D, smoothed representation) (Hansen et al., 2012). Similar observations were made in the gene body of *Atf6b* (*Activating Transcription Factor 6 Beta*), a gene implicated in the transcriptional downregulation of *Pgf* (*Placental Growth Factor*) in response to endoplasmic reticulum stress in pathological placentas (Mizuuchi et al., 2016). As for genes predominantly expressed in the embryo, *Mir219a-2/Mir219b*, a brain-specific non-coding microRNA, showed higher methylation in the placenta (Figure 2D). It was recently shown that *Mir219* was abnormally expressed during pregnancy in amnion retrieved specifically from obese women (Nardelli et al., 2014) and, interestingly, obesity has been suggested to cause epigenetic changes (Lillycrop and Burdge, 2011). Another example of placenta Hyper-DMRs is *Sox6* (*SRY-Box 6*), which is implicated in the terminal differentiation of muscle (Figure 2D) (Kamachi and Kondoh, 2013). These observations point to an association between tissue-specific DNA methylation levels of DMRs and biological functions. Gene ontology enrichment analyses further support that Hypo-DMRs were strongly associated to germline functions and reproduction (e.g., male and female gamete generation, reproduction, piRNA metabolic process, meiotic cell cycle, germ cell development) (Figure 2C). As for Hyper-DMRs, top biological processes were mostly associated



with developmental and differentiation processes (*e.g.*, regionalization, embryo development, pattern specification process, skeletal system, head development) (Figure 2C). Fittingly, the biological functions were completely divergent between Hypo- and Hyper-DMRs. Altogether, these results denote that Hypo- and Hyper-DMRs are present across genomic features between mid-gestation embryo and placenta, and that these DNA methylation divergences are implicated in promoting/repressing specific processes during embryonic and placental development.

### ***Presence of Distinctive DMR Categories between Mid-Gestation Embryo and Placenta***

Amongst DMRs, our analyses also suggest the presence of particular DMR categories based on their level of DNA methylation in the embryo and placenta (Figure 2A). By defining subsets of DMRs and establishing their dynamic properties between tissues, we might better understand the genome-wide asymmetry in DNA methylation levels observed between the embryo and the placenta. To do so, we first clustered DMR-associated tiles in 6 different categories based on their range of low, mid and high methylation level (Low; <20%, Mid; ≥20 to <80%, High; ≥80%) in the embryo and the placenta, and followed the DMR category transitions between both tissues. We observed that DMRs with High-levels of methylation in the embryo overlapped with a large proportion of DMRs that showed Mid-levels of methylation in the placenta (Figure 3A,B; High-Mid n=72 715), whereas only a fraction corresponded to DMRs with Low-levels of methylation in the placenta (Figure 3A,B; High-Low n=1 889). As for DMRs with Mid-levels of methylation in embryo, the largest part remained in that same Mid-levels category in the placenta (Figure 3A; Mid-Mid n=23 640). Nonetheless, a portion of these embryonic Mid-levels DMRs were directed to DMRs with either Low- (Figure 3A; Mid-Low n=9 055) or High- (Figure 3A; Mid-High n= 21) levels of methylation in the placenta. Finally, DMRs with Low-levels of methylation in the embryo all showed Mid-levels of methylation in the placenta (Figure 3A; Low-Mid n=2 920). Thus, when we subdivide our DMRs into distinctive categories, we uncover that embryonic cells possess a large proportion of DMRs of High-level (≥80%) of DNA methylation, which remain potentially static in embryonic tissues, whereas the vast majority of these DMRs have inferior and wide-range DNA methylation levels within placental tissue.

### ***Specific Genomic Features Associated with DMR Categories***

We next aimed to determine if the genomic distribution of embryo-placenta DMR categories was associated with distinct genomic features. First, by classifying by genomic annotations, we observed that DMRs with reduced methylation levels in the placenta (High-Mid, High-Low, Mid-Low) were prevalently found in intergenic regions (>50% of tiles) (Figure 3C), whereas DMR categories with equivalent (Mid-Mid) or superior methylation level (Mid-High, Low-Mid) in the placenta were more frequent in genic associated regions (>50% of tiles). However, divergence between DMR categories was observed when we performed ontology analyses on promoter regions (Figure S3), as each DMR subtype clearly showed distinct biological functions. For example, High-Mid DMRs top functions were related to genes (e.g., *Aszl*, *Tnp1*, *Piwil2*) associated with male gamete generation, piRNA metabolic process and male meiotic nuclear division, whereas those of the Low-Mid category were mostly associated with developmental aspects (e.g., skeletal system development, regionalization, nervous system development). Since we know that in placenta, activation of retrotransposon-derived genes is interrelated with low DNA methylation levels (Macaulay et al., 2011, Reiss et al., 2007, Cohen et al., 2011), we next assessed how DMR categories overlapped with major types of retrotransposons (LINE; long interspersed nuclear elements, SINE; short interspersed nuclear element, and LTR; long terminal repeats). Out of the DMR categories, those with High-levels of methylation in the embryo and either Mid- or Low-levels in the placenta (High-Mid and High-Low) showed the most enriched overlap with retrotransposons, with 92% and 96% respectively (Figure 3D). DMR categories associated with gain of methylation in the placenta (Mid-High and Low-Mid) showed the least overlap with retrotransposons, especially the Low-Mid subtype. This highlights that during the *de novo* acquisition of DNA methylation patterns, DMRs with High-levels of methylation in the embryo and lower levels in the placenta are almost exclusively within retrotransposons-associated sequences, whereas DMRs with Low-levels of methylation in the embryo and higher DNA methylation in the placenta are preferentially outside retrotransposons-associated sequences. Finally, we investigated the proximity of the DMR categories in regards to CpG rich (CpG islands; CGI), neighbouring (shore; < 2kb away from CGIs, shelf; 2-4kb away from CGIs) and distant (open sea; > 4kb away from CGIs) regions (Figure 3E). We observed that most DMR categories are depleted from CGIs and are mostly found in open sea regions. In contrast, ~60% of tiles in Low-Mid DMRs overlapped with CGI, shores and shelves, revealing that the acquisition of *de novo* methylation for these genomic

fragments in the extraembryonic lineage preferentially targets sequences inside or surrounding CGIs.

Altogether, these results indicate that the asymmetry within DMR categories, based on their methylation levels in the embryo and the placenta, can be associated to specific biological functions and genomic-derived features (e.g., CpG, retrotransposon contents). This is particularly apparent for DMRs with High-levels in the embryo (High-Mid, High-Low) and those with higher methylation levels in the placenta (Low-Mid).

### ***DMR Categories are Established During the De Novo Methylation Wave and Maintained Throughout Development***

To gain insights into the kinetics of lineage-specific DMR establishment between mid-gestation embryo and placenta, as well as their status during development, we assessed the levels of methylation associated with tiles for each DMR category as a function of their developmental stage. Publicly available sequencing data (Smith et al., 2012, Whidden et al., 2016) were analyzed using our custom script to generate 100bp tiles, and the DNA methylation levels for each tile were calculated. In E3.5 blastocysts, when the mouse genome is mostly depleted from DNA methylation marks, we observed low global DNA methylation levels (average <20%) for all DMR subtypes, with similar median levels between the committed cells of the inner cell mass (ICM) and trophectoderm lineages (Figure 4). DNA methylation levels tended to be higher in the trophectoderm for regions falling in the Mid-High DMRs, although measurements are based on very few DMRs for this specific category (n=21, Figure 3B, Mid-High). Since global DNA methylation is re-acquired in the next few subsequent developmental stages, we then asked whether the contrast in DNA methylation levels associated with the various DMR categories at mid-gestation would already be present between E6.5 epiblast and extraembryonic ectoderm (ExE) cell lineages, layers that are mostly composed of homogeneous and undifferentiated cell populations. For all DMR categories, DNA methylation levels in the E6.5 epiblast and ExE already showed similar pattern trends to those observed in the E10.5 embryo and placenta (Figure 4, Table S2). Interestingly, for all DMR categories we observed slightly higher DNA methylation levels in E6.5 ExE compared to E10.5 placenta (Figure 4, Table S2). However, when measured in the subsequent developmental stages (E10.5, E11.5, E15 and E18), levels associated with each category stabilized and remained in the same methylation range. This is true

for all categories, except for the Mid-High DMRs where methylation levels are reduced by ~20% at E18. As for the E6.5 epiblast DNA methylation profiles, they closely matched those observed in the E10.5 embryo, except again for the Mid-High DMRs. For each of the DMR subtypes, the DNA methylation levels were largely stable and persisted across other time points (E6.5, E10.5, E11.5) in embryonic cells. Although no public DNA methylation data were available for whole embryos at later stages, when we overlapped tiles associated with E10.5 DMR categories with data from differentiated tissues of adult mice, the global DNA methylation profiles closely matched those for the majority of DMR categories (High-Mid, High-Low, Mid-Mid and Mid-Low) (Figure 4, Figure S4). We conclude that the various DMR categories observed at E10.5 are established during the embryonic and extraembryonic lineage-specification processes occurring during the peri-implantation wave of *de novo* methylation, and that these DNA methylation landscapes are widely retained throughout embryo and placenta development. Furthermore, for most DMR categories, the DNA methylation levels observed in developing embryos are long-lasting and conserved throughout somatic cell differentiation.

### ***Dnmt3a- or Dnmt3b-Deficiency Alters Proper Establishment of DMR-Associated Patterns***

Since the combined activity of DNMT3A and DNMT3B is essential for proper establishment of DNA methylation profiles and normal development, we next sought to define the contribution of each enzyme in the *de novo* establishment of DNA methylation in subtypes of DMRs in embryonic and extraembryonic cell lineages. To do so, we used DNA methylation data from publicly available datasets (whole genome bisulfite sequencing and RRBS) at E6.5 (epiblast and ExE) and E8.5 (embryo) with various inactive forms of *Dnmts*. First, when we overlapped our All-tiles subset, we observed a substantial reduction ( $p \leq 0.0001$ ) in average DNA methylation in absence of DNMT3A (37.81%) or DNMT3B (31.48%) in the E6.5 epiblast compared to wild-type (44.81%), whereas in the E6.5 ExE such a comparable loss was only associated with a *Dnmt3b*-deficiency (wt: 34.38% vs *Dnmt3b*<sup>-/-</sup>: 19.33%,  $p \leq 0.0001$ ) (Figure S5). Similarly, in the E8.5 embryo, a significant reduction in average DNA methylation level was measured with lack of *Dnmt3a* or *Dnmt3b* expression compared to wild-type (wt: 47.5%; *Dnmt3a*<sup>-/-</sup>: 43.6%; *Dnmt3b*<sup>-/-</sup>: 34%,  $p \leq 0.0001$ ) (Figure S5). For most DMR subtypes, absence of DNMT3A caused modest or no reduction on overall DNA methylation levels in E6.5 epiblast and ExE (Figure 5A and S6, Table S3). Intriguingly, *Dnmt3a*-deficiency caused a slight gain of

methylation (wt: 76.9% vs *Dnmt3a*<sup>-/-</sup>: 81.5%,  $p \leq 0.0001$ ) level in the E6.5 epiblast for High-Mid DMRs, suggesting a potential overcompensation effect by DNMT3B in the epiblast on this specific DMR subtype. In comparison, *Dnmt3b*-depletion led to a substantial loss of average methylation levels in all DMR categories in the E6.5 epiblast and ExE, except for epiblast High-Mid DMRs (Figure 5A, Table S3) for which a compensatory mechanism provided high levels of methylation (wt: 76.9% vs *Dnmt3b*<sup>-/-</sup>: 71.6%). The compensatory mechanism on High-Mid DMRs in response to *Dnmt3b*-deficiency was ineffective in the E6.5 ExE. When we focused on promoter-TSS for each DMR categories, we observed again that loss of methylation for these regulatory regions was principally associated with *Dnmt3b*-deficiency (Figure 5B). The promoter-TSS regions associated with High-Mid DMRs retained relatively high methylation levels for either *Dnmt3a*<sup>-/-</sup> or *Dnmt3b*<sup>-/-</sup> epiblast samples, demonstrating a robust and compensatory *de novo* methylation mechanism. To further underline the impact of DNMT3A or DNMT3B on the *de novo* methylation of DMRs, we measured methylation levels for DMRs selected from our gene enrichment analyses (*Fgb*, *P2rx7*, *Pcyt2*, *Etnppl*, *Ralgds*, *Lrp5*) and other genomic segments covered by multiple tiles (*Cxxc1*, *Fcgrt*, *Lamp5*, *Mbd1*, *Lphn1*, *Pick1*, *Irf1*) (Figure S7 & S8) in *Dnmt3a*- or *Dnmt3b*-deficient epiblast and ExE. In line with our global observations, for most DMR-associated tiles, a *Dnmt3b*-deficiency in E6.5 epiblast or ExE caused a more severe loss of methylation compared to lack of *Dnmt3a*. However, for some regions in the E6.5 epiblast (e.g., *Pick1*, *Irf1*), *Dnmt3a*<sup>-/-</sup> methylation levels were inferior to those of *Dnmt3b*<sup>-/-</sup>. Noteworthy, for most DMRs, lack of co-factor *Dnmt3l* affected DNA methylation levels to greater extent than *Dnmt3a*-deficiency (Figure S6). Overall, we show that of DNMT3A and DNMT3B participate in the establishment of the asymmetric methylation patterns associated with the various DMR categories in both embryonic and extraembryonic cells, with DNMT3B being the principal contributor in both cell lineages during the *de novo* reprogramming wave as it can compensate almost entirely for the absence of DNMT3A.

### ***Decline in Compensatory DNA Methylation Mechanisms in Response to Dnmt3a- or Dnmt3b-Deficiency.***

As embryonic development progresses from E6.5 to E8.5, our data suggest that lack of DNMT3A or DNMT3B further reduces global methylation levels of DMRs (High-Mid, High-Low, Mid-Low and Mid-Mid), evoking that absence of either enzymatic activity causes an

additive and extended effect (Figure 5A-B). To further define the robustness in compensatory mechanism between DNMT3A or DNMT3B in the establishment and maintenance of DNA methylation on DMRs categories, we focused on High-Mid promoter-TSS- associated DMRs as they have the highest DNA methylation levels and require the most *de novo* methyltransferase activity. Methylation differences of  $\geq 20\%$  between wild-type and *Dnmt3a*- or *Dnmt3b*-deficient samples were considered as regions showing substantial lack of compensation. In agreement with our results (Figure 5A-B), we observed that at E6.5, DNMT3B can compensate almost entirely for DNMT3A loss by maintaining methylation levels on most promoters-TSS associated tiles in the epiblast ( $410/437 = 93.8\%$ ) and ExE ( $558/602 = 92.7\%$ ), whereas DNMT3A can only partially alleviate the lack of DNMT3B in the epiblast ( $315/410 = 78.6\%$ ) and ExE ( $244/524 = 46.6\%$ ) (Figure 6A-B). As embryonic cell lineages development evolves between E6.5 and E8.5, global methylation levels increase on promoter-TSS of High-Mid DMRs. However, we detected a sharp decline in the compensatory mechanism to rescue the *de novo* and/or maintenance of methylation levels of promoter-TSS DMRs in the *Dnmt3a*- ( $524/627 = 80.9\%$ ) or *Dnmt3b*- ( $256/622 = 41.2\%$ ) deficient E8.5 embryos. This is further highlighted when we focus on a subgroup of 314 promoter-TSS associated tiles overlapping all of 9 data sets (Figure 6C), including gene promoters (e.g., *Asz1*, *Catsper1*, *Ccdc42*, *Dmrtb1*, *Piwi12*, *Rpl10l*, *Sox30*, *Sycp1*, *Tnp1*, *Ttll1*, *Zfn42*) related to our top enriched biological functions (i.e., piRNA, gamete generation and germ cells, meiotic nuclear division). Although E8.5 *Dnmt3a*- or *Dnmt3b*-deficient ExE data was not available, our data suggest that greater compensation failure would also be observed in this tissue. Thus, embryonic-placental DMRs need the combined action of DNMT3A and DNMT3B to both establish and maintain proper asymmetric levels during early development as compensatory DNA methylation mechanisms during the *de novo* wave of methylation decline overtime and fail to overcome methyltransferase shortage in later development stages.

## DISCUSSION

With recent breakthroughs in high-throughput sequencing, we now have a better understanding of the dynamic of DNA methylation erasure occurring in early cleavage stage embryos following fertilization. However, the discrepancies in acquisition of genome-wide DNA methylation patterns in early post-implantation embryonic and extraembryonic cell lineages



remain to be methodically delineated. To address this issue and further our understanding of the DNA methylation asymmetry that guides the developmental trajectory of embryonic and extraembryonic cell lineages, we established genome-wide DNA methylation profiles of mouse embryo and placenta at mid-gestation, and analyzed various publicly available developmental stage specific embryo and placenta DNA methylation datasets. Using this strategy, we uncovered that 45% of the genomic regions analyzed differ in DNA methylation status ( $\geq 20\%$ ) between mid-gestation embryo and placenta, and that these DMRs can be further divided into categories based on their levels of DNA methylation (Low;  $< 20\%$ , Mid;  $\geq 20$  to  $< 80\%$ , High;  $\geq 80\%$ ) in the embryo and placenta. We show that the embryo and placenta acquire specific DMR categories during the early stage of the *de novo* DNA methylation wave, and that these DMRs persist throughout prenatal development, as well as into somatic adult tissues. Furthermore, we show that *Dnmt3b* primarily drives the divergence in DNA methylation levels associated with these specific DMRs and that *de novo* methyltransferase activity of *Dnmt3b* can almost entirely compensate for lack of *Dnmt3a* in the asymmetric establishment of embryonic and placental DMRs, but that *Dnmt3a* can only partially palliate the absence of *Dnmt3b*. However, with developmental progression, this compensatory DNA methylation mechanism becomes less effective.

Our results indicate that the kinetics of DNA methylation acquisition leading to specific embryo-placenta DMR categories is not a stepwise process occurring throughout cell fate decisions and patterning of embryonic and extraembryonic lineages, but a prompt progression in the early post-implanted conceptus. These results are in line with studies reflecting that the initiation of asymmetric DNA methylation levels begins within the trophoblast and the inner cell mass of the blastocyst (Santos et al., 2002), and becomes highly evident by the time the epiblast acquires its initial global DNA methylation patterns at E6.5 during the *de novo* reprogramming wave (Auclair et al. 2014, Smith et al. 2017). Our results show that the acquisition period between E4.5 and E6.5 is particularly key to establishing asymmetric DNA methylation patterns associated with mid-gestation embryo-placenta DMR classes, and that these DMR associated-patterns are long-lasting across stages of prenatal development. Since we studied cell populations derived from embryonic and placental tissues, we cannot dismiss the prevalence of cell-to-cell heterogeneity in the acquisition kinetics of specific DMR patterns. Despite this concern, our results indicate that embryonic cells have a large body of DMRs with High-levels ( $\geq 80\%$ ) and



Low-levels (<20%) of methylation that remain static across development, as well as in somatic cell types (High-Mid & High-Low DMRs), whereas compared to the embryo, the placental DMRs have overall lower methylation levels and are more broadly distributed amongst methylation levels, which has also been shown in other studies where genome-wide DNA methylation profiles of placental cells were compared to other tissues and specific cell types (Schroeder et al., 2013; Chatterjee et al., 2016; Smith et al., 2017). Lower methylation levels in the placenta have been associated with reduced *de novo* methyltransferase activity in the ExE during the *de novo* reprogramming wave (Fulka et al., 2004, Santos et al., 2002). Nevertheless, we observe methylation level peaks for all DMR categories within the ExE at E6.5 before levels stabilize at E10.5. As of now, the implication of these methylation level peaks on future regulation mechanisms and methylation profiles is unknown. Moreover, it remains to be determined whether global reduction in DNA methylation marks on DMRs between the E6.5 and E10.5 extraembryonic cell lineages is stochastic or targeted, and whether it occurs through passive or active mechanisms.

We also observed an enrichment of retrotransposons (i.e., LINE, SINE, LTR) in DMRs especially in those with High-levels of methylation in the embryo and lower-levels in the placenta, whereas DMRs with Low-levels of methylation in the embryo and higher levels in the placenta are preferentially outside retrotransposons-associated sequences. Earlier findings of Chapman et al. (Chapman et al., 1984) revealed that repeat regions in the placenta appear to lack tight control of their methylation patterns, perhaps indicating that maintaining methylation, and therefore repression of these elements for genome stability and integrity, is not critical given the relatively short lifespan of this organ. However, we do observe Mid-range methylation levels (20-80%) in the placenta for a substantial portion of DMRs that are associated with retrotransposons, revealing that specific genomic regions associated with repetitive elements do need tight regulation in extraembryonic cell lineages for proper development. These results are in line with findings exposing that the deletion of genome-defense gene *Tex19.1* leads to the de-repression of LINE1 and compromises placental development, suggesting that disparities between retrotransposon suppression and genome-defense mechanisms might contribute to placenta dysfunction and disease (Reichmann et al., 2013).

DNMT3A and DNMT3B are required to establish proper methylation profiles on the embryonic genome during the *de novo* reprogramming wave, as both methyltransferase enzymes

have redundant, but also specific functions. However, the activity of DNMT3B is the main contributor in the acquisition of profiles in epiblast cells, and especially commands methylation on CGIs associated with developmental genes (Auclair et al., 2014). Auclair et al. highlighted that in the absence of DNMT3B, DNMT3A was not able to counterbalance, leading to the loss of promoter-CGI methylation and gain of expression of germline genes (e.g., *Sycp1*, *Sycp2*, *Mael*, *Rpl10l*, *Dmrtb1*) in somatic cells of the embryo. Here, we show that the promoter of these germline genes, associated with meiotic and piRNA processes as well as other genes with similar biological functions, are highly enriched in High-Mid DMRs. We also reveal that for this particular set of High-Mid DMRs, mainly deprived of CGIs, DNMT3A is able to substantially counterbalance the lack of DNMT3B in the E6.5 epiblast and establish global DNA methylation levels, whereas in the ExE, this compensatory mechanism is rather inefficient. Globally, we show that DNMT3B is much more potent at compensating than DNMT3A in both the epiblast and ExE for all DMR categories, indicating that DNMT3B is the main *de novo* enzyme driving asymmetric DNA methylation patterns between the embryo and placenta. Although compensatory mechanisms have been observed in *Dnmt3a* or *Dnmt3b*-depleted conceptuses, we still do not fully understand the process as *Dnmt3a* and *Dnmt3b* have cell lineage specific expression during the peri-implantation developmental period. As development progresses, we observed that the compensation mechanism in *Dnmt3a* or *Dnmt3b*-deficient embryos remains apparent at E8.5 on most DMR categories, but is less effective as the methylation gaps increase compared to wild-type. This correlates with a developmental period where DNMT3A is now the main *de novo* methyltransferase enzyme in both the embryo and placenta (Okano et al., 1999, Watanabe et al., 2002), and with a compensatory activity of DNMT3A being less effective. This suggests that DNMT3B activity is critical to ensure proper establishment of DNA methylation asymmetry between the embryonic and extraembryonic cell lineages during the *de novo* reprogramming wave, but that DNMT3A is required during the developmental progression to safeguard methylation levels on DMR categories.

## CONCLUSION

We demonstrate that asymmetry between embryo and placenta DNA methylation patterns occurs rapidly during *de novo* acquisition of methylation marks in the early post-implanted conceptus, and that these patterns are long-lasting across subtypes of DMRs. We also reveal that

at the peri-implantation stages, *de novo* methyltransferase activity of DNMT3B is the main provider of asymmetric methylation marks on DMRs, and that it largely palliates the lack of DNMT3A in the epiblast and ExE. However, as development progresses, DNMT3A becomes the principal *de novo* methyltransferase by mid-gestation, and DNMT3B methyltransferase activity is less effective at promoting compensation. These results further underline why embryos developing without DNMT3B have severe DNA methylation defects and die at mid-gestation, whereas those without DNMT3A only die postnatally. Further investigation is required to determine the molecular mechanisms controlling the precise *de novo* acquisition of long-lasting methylation marks on specific DMR subtypes in the embryonic and extraembryonic cell lineages, and how errors in this process could lead to abnormal development and diseases.

## ACKNOWLEDGMENTS

We thank the McGraw lab for critical comments and suggestions, as well as Elizabeth Maurice-Elder for editing.

## COMPETING INTERESTS

No competing interests declared

## FUNDING

This work was supported by a research grant from the Natural Sciences and Engineering Research Council of Canada. We acknowledge the Fonds de Recherche du Québec en Santé (S.M, L.M.L) and the Réseau Québécois en Reproduction and Fonds de recherche du Québec – Nature et technologies (K.D) for salary awards.

## DATA AVAILABILITY

The data from this study have been submitted to the Gene Expression Omnibus (#GSE95610).  
Reviewer link:

<https://www.ncbi.nlm.nih.gov/geo/query/acc.cgi?token=ghsnmqoctlgjlcj&acc=GSE95610>

**Table S1. Annotation and DNA methylation values associated with DMRs.**

**Table S2. DNA methylation levels for DMR categorises across development.**

**Table S3. DNA methylation levels for DMR categories in various *Dnmt* knockout mouse models.**

**Table S4. Number of 100bp tiles in each category of public data that overlap with Embryo-Placenta DMRs (related to Figure 4; 5A; S4; S5; S6)**

## REFERENCES

- AKALIN, A., KORMAKSSON, M., LI, S., GARRETT-BAKELMAN, F. E., FIGUEROA, M. E., MELNICK, A. & MASON, C. E. 2012. methylKit: a comprehensive R package for the analysis of genome-wide DNA methylation profiles. *Genome Biol*, 13, R87.
- AUCLAIR, G., GUIBERT, S., BENDER, A. & WEBER, M. 2014. Ontogeny of CpG island methylation and specificity of DNMT3 methyltransferases during embryonic development in the mouse. *Genome Biol*, 15, 545.
- BESTOR, T. H. 2000. The DNA methyltransferases of mammals. *Hum Mol Genet*, 9, 2395-402.
- BOYLE, P., CLEMENT, K., GU, H., SMITH, Z. D., ZILLER, M., FOSTEL, J. L., HOLMES, L., MELDRIM, J., KELLEY, F., GNIRKE, A. & MEISSNER, A. 2012. Gel-free multiplexed reduced representation bisulfite sequencing for large-scale DNA methylation profiling. *Genome Biol*, 13, R92.
- CHAPMAN, V., FORRESTER, L., SANFORD, J., HASTIE, N. & ROSSANT, J. 1984. Cell lineage-specific undermethylation of mouse repetitive DNA. *Nature*, 307, 284-6.
- CHATTERJEE, A., MACAULAY, E. C., RODGER, E. J., STOCKWELL, P. A., PARRY, M. F., ROBERTS, H. E., SLATTER, T. L., HUNG, N. A., DEVENISH, C. J. & MORISON, I. M. 2016. Placental Hypomethylation Is More Pronounced in Genomic Loci Devoid of Retroelements. *G3 (Bethesda)*, 6, 1911-21.
- CHUONG, E. B. 2013. Retroviruses facilitate the rapid evolution of the mammalian placenta. *Bioessays*, 35, 853-61.
- CHURCH, D. M., GOODSTADT, L., HILLIER, L. W., ZODY, M. C., GOLDSTEIN, S., SHE, X., BULT, C. J., AGARWALA, R., CHERRY, J. L., DICUCCIO, M., HLAVINA, W., KAPUSTIN, Y., MERIC, P., MAGLOTT, D., BIRTLE, Z., MARQUES, A. C., GRAVES, T., ZHOU, S., TEAGUE, B., POTAMOUSIS, K., CHURAS, C., PLACE, M., HERSCHLEB, J., RUNNHEIM, R., FORREST, D., AMOS-LANDGRAF, J., SCHWARTZ, D. C., CHENG, Z., LINDBLAD-TOH, K., EICHLER, E. E., PONTING, C. P. & MOUSE GENOME SEQUENCING, C. 2009. Lineage-specific biology revealed by a finished genome assembly of the mouse. *PLoS Biol*, 7, e1000112.
- COHEN, C. J., REBOLLO, R., BABOVIC, S., DAI, E. L., ROBINSON, W. P. & MAGER, D. L. 2011. Placenta-specific expression of the interleukin-2 (IL-2) receptor beta subunit from an endogenous retroviral promoter. *J Biol Chem*, 286, 35543-52.

- CROSS, J. C. 2000. Genetic insights into trophoblast differentiation and placental morphogenesis. *Semin Cell Dev Biol*, 11, 105-13.
- CROSS, J. C., WERB, Z. & FISHER, S. J. 1994. Implantation and the placenta: key pieces of the development puzzle. *Science*, 266, 1508-18.
- DECATO, B. E., LOPEZ-TELLO, J., SFERRUZZI-PERRI, A. N., SMITH, A. D. & DEAN, M. D. 2017. DNA Methylation Divergence and Tissue Specialization in the Developing Mouse Placenta. *Mol Biol Evol*, 34, 1702-1712.
- EMERA, D. & WAGNER, G. P. 2012. Transposable element recruitments in the mammalian placenta: impacts and mechanisms. *Brief Funct Genomics*, 11, 267-76.
- FULKA, H., MRAZEK, M., TEPLA, O. & FULKA, J., JR. 2004. DNA methylation pattern in human zygotes and developing embryos. *Reproduction*, 128, 703-8.
- GU, H., SMITH, Z. D., BOCK, C., BOYLE, P., GNIRKE, A. & MEISSNER, A. 2011. Preparation of reduced representation bisulfite sequencing libraries for genome-scale DNA methylation profiling. *Nat Protoc*, 6, 468-81.
- GUO, H., ZHU, P., YAN, L., LI, R., HU, B., LIAN, Y., YAN, J., REN, X., LIN, S., LI, J., JIN, X., SHI, X., LIU, P., WANG, X., WANG, W., WEI, Y., LI, X., GUO, F., WU, X., FAN, X., YONG, J., WEN, L., XIE, S. X., TANG, F. & QIAO, J. 2014. The DNA methylation landscape of human early embryos. *Nature*, 511, 606-10.
- HAIG, D. 2012. Retroviruses and the placenta. *Curr Biol*, 22, R609-13.
- HANSEN, K. D., LANGMEAD, B. & IRIZARRY, R. A. 2012. BSmooth: from whole genome bisulfite sequencing reads to differentially methylated regions. *Genome Biol*, 13, R83.
- HIRASAWA, R., CHIBA, H., KANEDA, M., TAJIMA, S., LI, E., JAENISCH, R. & SASAKI, H. 2008. Maternal and zygotic Dnmt1 are necessary and sufficient for the maintenance of DNA methylation imprints during preimplantation development. *Genes Dev*, 22, 1607-16.
- HON, G. C., RAJAGOPAL, N., SHEN, Y., MCCLEARY, D. F., YUE, F., DANG, M. D. & REN, B. 2013. Epigenetic memory at embryonic enhancers identified in DNA methylation maps from adult mouse tissues. *Nat Genet*, 45, 1198-206.
- HOWELL, C. Y., BESTOR, T. H., DING, F., LATHAM, K. E., MERTINEIT, C., TRASLER, J. M. & CHAILLET, J. R. 2001. Genomic imprinting disrupted by a maternal effect mutation in the Dnmt1 gene. *Cell*, 104, 829-38.
- KAMACHI, Y. & KONDOH, H. 2013. Sox proteins: regulators of cell fate specification and differentiation. *Development*, 140, 4129-44.
- KANEDA, M., OKANO, M., HATA, K., SADO, T., TSUJIMOTO, N., LI, E. & SASAKI, H. 2004. Essential role for de novo DNA methyltransferase Dnmt3a in paternal and maternal imprinting. *Nature*, 429, 900-3.
- KATO, Y., KANEDA, M., HATA, K., KUMAKI, K., HISANO, M., KOHARA, Y., OKANO, M., LI, E., NOZAKI, M. & SASAKI, H. 2007. Role of the Dnmt3 family in de novo methylation of imprinted and repetitive sequences during male germ cell development in the mouse. *Hum Mol Genet*, 16, 2272-80.
- LEGAULT, L.-M., CHAN, D. & MCGRAW, S. 2019. Rapid Multiplexed Reduced Representation Bisulfite Sequencing Library Prep (rRRBS). *BIO-PROTOCOL*, 9.
- LEI, H., OH, S. P., OKANO, M., JUTTERMANN, R., GOSS, K. A., JAENISCH, R. & LI, E. 1996. De novo DNA cytosine methyltransferase activities in mouse embryonic stem cells. *Development*, 122, 3195-205.



- LEONHARDT, H., PAGE, A. W., WEIER, H. U. & BESTOR, T. H. 1992. A targeting sequence directs DNA methyltransferase to sites of DNA replication in mammalian nuclei. *Cell*, 71, 865-73.
- LI, E. 2002. Chromatin modification and epigenetic reprogramming in mammalian development. *Nat Rev Genet*, 3, 662-73.
- LI, E., BESTOR, T. H. & JAENISCH, R. 1992. Targeted mutation of the DNA methyltransferase gene results in embryonic lethality. *Cell*, 69, 915-26.
- LILLYCROP, K. A. & BURDGE, G. C. 2011. The effect of nutrition during early life on the epigenetic regulation of transcription and implications for human diseases. *J Nutrigenet Nutrigenomics*, 4, 248-60.
- MACAULAY, E. C., WEEKS, R. J., ANDREWS, S. & MORISON, I. M. 2011. Hypomethylation of functional retrotransposon-derived genes in the human placenta. *Mamm Genome*, 22, 722-35.
- MAGNUS, N., GARNIER, D., MEEHAN, B., MCGRAW, S., LEE, T. H., CARON, M., BOURQUE, G., MILSOM, C., JABADO, N., TRASLER, J., PAWLINSKI, R., MACKMAN, N. & RAK, J. 2014. Tissue factor expression provokes escape from tumor dormancy and leads to genomic alterations. *Proc Natl Acad Sci U S A*, 111, 3544-9.
- MCGRAW, S., ZHANG, J. X., FARAG, M., CHAN, D., CARON, M., KONERMANN, C., OAKES, C. C., MOHAN, K. N., PLASS, C., PASTINEN, T., BOURQUE, G., CHAILLET, J. R. & TRASLER, J. M. 2015. Transient DNMT1 suppression reveals hidden heritable marks in the genome. *Nucleic Acids Res*.
- MI, S., LEE, X., LI, X., VELDMAN, G. M., FINNERTY, H., RACIE, L., LAVALLIE, E., TANG, X. Y., EDOUARD, P., HOWES, S., KEITH, J. C., JR. & MCCOY, J. M. 2000. Syncytin is a captive retroviral envelope protein involved in human placental morphogenesis. *Nature*, 403, 785-9.
- MIZUUCHI, M., CINDROVA-DAVIES, T., OLOVSSON, M., CHARNOCK-JONES, D. S., BURTON, G. J. & YUNG, H. W. 2016. Placental endoplasmic reticulum stress negatively regulates transcription of placental growth factor via ATF4 and ATF6beta: implications for the pathophysiology of human pregnancy complications. *J Pathol*, 238, 550-61.
- MONK, M. 1987. Genomic imprinting. Memories of mother and father. *Nature*, 328, 203-4.
- MORGAN, H. D., SANTOS, F., GREEN, K., DEAN, W. & REIK, W. 2005. Epigenetic reprogramming in mammals. *Hum Mol Genet*, 14 Spec No 1, R47-58.
- NAKANISHI, M. O., HAYAKAWA, K., NAKABAYASHI, K., HATA, K., SHIOTA, K. & TANAKA, S. 2012. Trophoblast-specific DNA methylation occurs after the segregation of the trophoctoderm and inner cell mass in the mouse periimplantation embryo. *Epigenetics*, 7, 173-82.
- NARDELLI, C., IAFFALDANO, L., FERRIGNO, M., LABRUNA, G., MARUOTTI, G. M., QUAGLIA, F., CAPOBIANCO, V., DI NOTO, R., DEL VECCHIO, L., MARTINELLI, P., PASTORE, L. & SACCHETTI, L. 2014. Characterization and predicted role of the microRNA expression profile in amnion from obese pregnant women. *Int J Obes (Lond)*, 38, 466-9.
- ODA, M., OXLEY, D., DEAN, W. & REIK, W. 2013. Regulation of lineage specific DNA hypomethylation in mouse trophoctoderm. *PLoS One*, 8, e68846.

- OKAHARA, G., MATSUBARA, S., ODA, T., SUGIMOTO, J., JINNO, Y. & KANAYA, F. 2004. Expression analyses of human endogenous retroviruses (HERVs): tissue-specific and developmental stage-dependent expression of HERVs. *Genomics*, 84, 982-90.
- OKANO, M., BELL, D. W., HABER, D. A. & LI, E. 1999. DNA methyltransferases Dnmt3a and Dnmt3b are essential for de novo methylation and mammalian development. *Cell*, 99, 247-57.
- PICHE, J., GOSSET, N., LEGAULT, L. M., PACIS, A., ONEGLIA, A., CARON, M., CHETAILE, P., BARREIRO, L., LIU, D., QI, X., NATTEL, S., LECLERC, S., BRETON-LARRIVEE, M., MCGRAW, S. & ANDELFINGER, G. 2019. Molecular Signature of CAID Syndrome: Noncanonical Roles of SGO1 in Regulation of TGF-beta Signaling and Epigenomics. *Cell Mol Gastroenterol Hepatol*, 7, 411-431.
- PRICE, E. M., COTTON, A. M., PENAHERRERA, M. S., MCFADDEN, D. E., KOBOR, M. S. & ROBINSON, W. 2012. Different measures of "genome-wide" DNA methylation exhibit unique properties in placental and somatic tissues. *Epigenetics*, 7, 652-63.
- REICHMANN, J., REDDINGTON, J. P., BEST, D., READ, D., OLLINGER, R., MEEHAN, R. R. & ADAMS, I. R. 2013. The genome-defence gene Tex19.1 suppresses LINE-1 retrotransposons in the placenta and prevents intra-uterine growth retardation in mice. *Hum Mol Genet*, 22, 1791-806.
- REISS, D., ZHANG, Y. & MAGER, D. L. 2007. Widely variable endogenous retroviral methylation levels in human placenta. *Nucleic Acids Res*, 35, 4743-54.
- ROBINSON, W. P. & PRICE, E. M. 2015. The human placental methylome. *Cold Spring Harb Perspect Med*, 5, a023044.
- ROSSANT, J. & CROSS, J. C. 2001. Placental development: lessons from mouse mutants. *Nat Rev Genet*, 2, 538-48.
- SANTOS, F., HENDRICH, B., REIK, W. & DEAN, W. 2002. Dynamic reprogramming of DNA methylation in the early mouse embryo. *Dev Biol*, 241, 172-82.
- SCHROEDER, D. I., BLAIR, J. D., LOTT, P., YU, H. O., HONG, D., CRARY, F., ASHWOOD, P., WALKER, C., KORF, I., ROBINSON, W. P. & LASALLE, J. M. 2013. The human placenta methylome. *Proc Natl Acad Sci U S A*, 110, 6037-42.
- SENNER, C. E., KRUEGER, F., OXLEY, D., ANDREWS, S. & HEMBERGER, M. 2012. DNA methylation profiles define stem cell identity and reveal a tight embryonic-extraembryonic lineage boundary. *Stem Cells*, 30, 2732-45.
- SHAFFER, B., MCGRAW, S., XIAO, S. C., CHAN, D., TRASLER, J. & CHAILLET, J. R. 2015. The dnmt1 intrinsically disordered domain regulates genomic methylation during development. *Genetics*, 199, 533-41.
- SLOTKIN, R. K. & MARTIENSSEN, R. 2007. Transposable elements and the epigenetic regulation of the genome. *Nat Rev Genet*, 8, 272-85.
- SMITH, Z. D., CHAN, M. M., HUMM, K. C., KARNIK, R., MEKHOUBAD, S., REGEV, A., EGGAN, K. & MEISSNER, A. 2014. DNA methylation dynamics of the human preimplantation embryo. *Nature*, 511, 611-5.
- SMITH, Z. D., CHAN, M. M., MIKKELSEN, T. S., GU, H., GNIRKE, A., REGEV, A. & MEISSNER, A. 2012. A unique regulatory phase of DNA methylation in the early mammalian embryo. *Nature*, 484, 339-44.
- SMITH, Z. D., SHI, J., GU, H., DONAGHEY, J., CLEMENT, K., CACCHIARELLI, D., GNIRKE, A., MICHOR, F. & MEISSNER, A. 2017. Epigenetic restriction of extraembryonic lineages mirrors the somatic transition to cancer. *Nature*, 549, 543-547.



- WARREN, I. A., NAVILLE, M., CHALOPIN, D., LEVIN, P., BERGER, C. S., GALIANA, D. & VOLFF, J. N. 2015. Evolutionary impact of transposable elements on genomic diversity and lineage-specific innovation in vertebrates. *Chromosome Res*, 23, 505-31.
- WATANABE, D., SUETAKE, I., TADA, T. & TAJIMA, S. 2002. Stage- and cell-specific expression of Dnmt3a and Dnmt3b during embryogenesis. *Mech Dev*, 118, 187-90.
- WHIDDEN, L., MARTEL, J., RAHIMI, S., RICHARD CHAILLET, J., CHAN, D. & TRASLER, J. M. 2016. Compromised oocyte quality and assisted reproduction contribute to sex-specific effects on offspring outcomes and epigenetic patterning. *Hum Mol Genet*.
- XIE, M., HONG, C., ZHANG, B., LOWDON, R. F., XING, X., LI, D., ZHOU, X., LEE, H. J., MAIRE, C. L., LIGON, K. L., GASCARD, P., SIGAROUNDINIA, M., TLSTY, T. D., KADLECEK, T., WEISS, A., O'GEEN, H., FARNHAM, P. J., MADDEN, P. A., MUNGALL, A. J., TAM, A., KAMOH, B., CHO, S., MOORE, R., HIRST, M., MARRA, M. A., COSTELLO, J. F. & WANG, T. 2013. DNA hypomethylation within specific transposable element families associates with tissue-specific enhancer landscape. *Nat Genet*, 45, 836-41.
- ZHOU, Y., ZHOU, B., PACHE, L., CHANG, M., KHODABAKHSHI, A. H., TANASEICHUK, O., BENNER, C. & CHANDA, S. K. 2019. Metascope provides a biologist-oriented resource for the analysis of systems-level datasets. *Nat Commun*, 10, 1523.

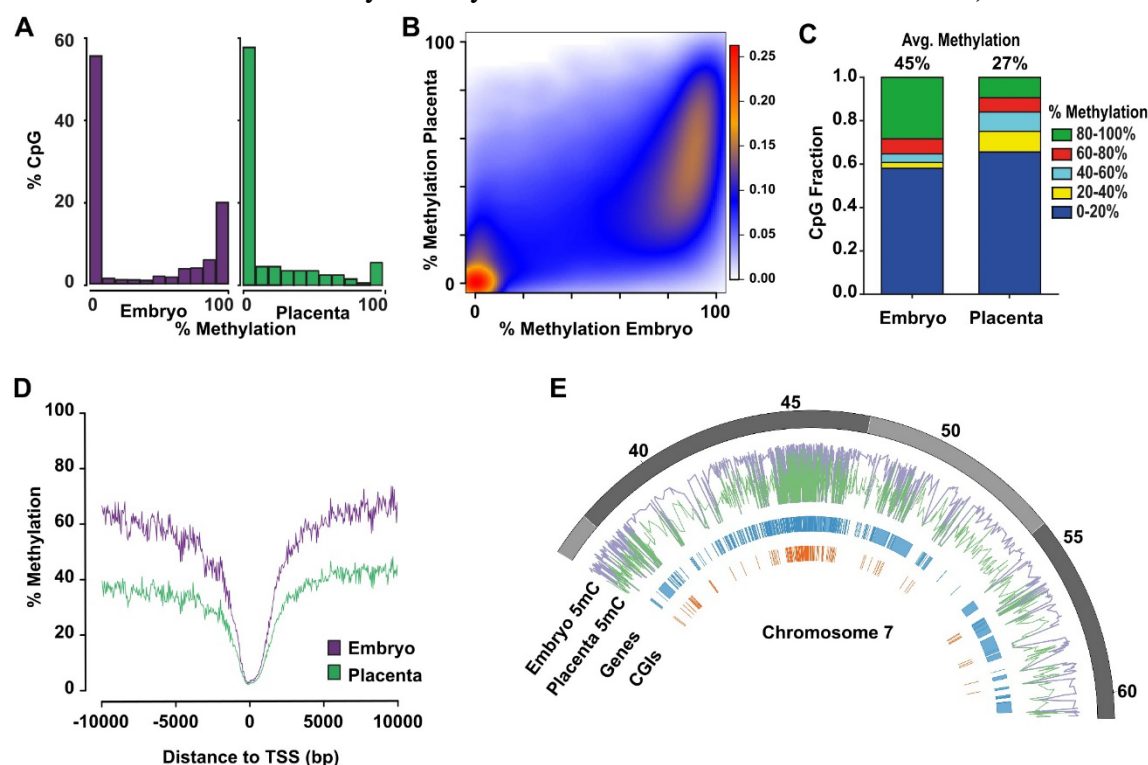

**Figure 1. Distinctive patterns of genome-wide DNA methylation accumulation between mid-gestation embryo and placenta.** Analyses of genome-wide DNA methylation sequencing results for embryo (n=4) and placenta (n=4). **A)** Density histograms showing the distribution of CpG methylation levels for embryo (purple) and placenta (green). **B)** Pairwise comparison of CpG methylation between embryo and placenta. Density increases from blue to red. **C)** CpG fraction of 100 bp tiles within 0-20%, 20-40%, 40-60%, 60-80% and 80-100% ranges in embryo

and placenta. Shown above bars, is the average CpG methylation for each unique tile represented in graph. **D)** DNA methylation means surrounding the transcription start site (TSS) for All-tiles in each experimental group. **E)** Circle plot showing methylation average of embryo (*purple*) and placenta (*green*) across a portion of chromosome 7.

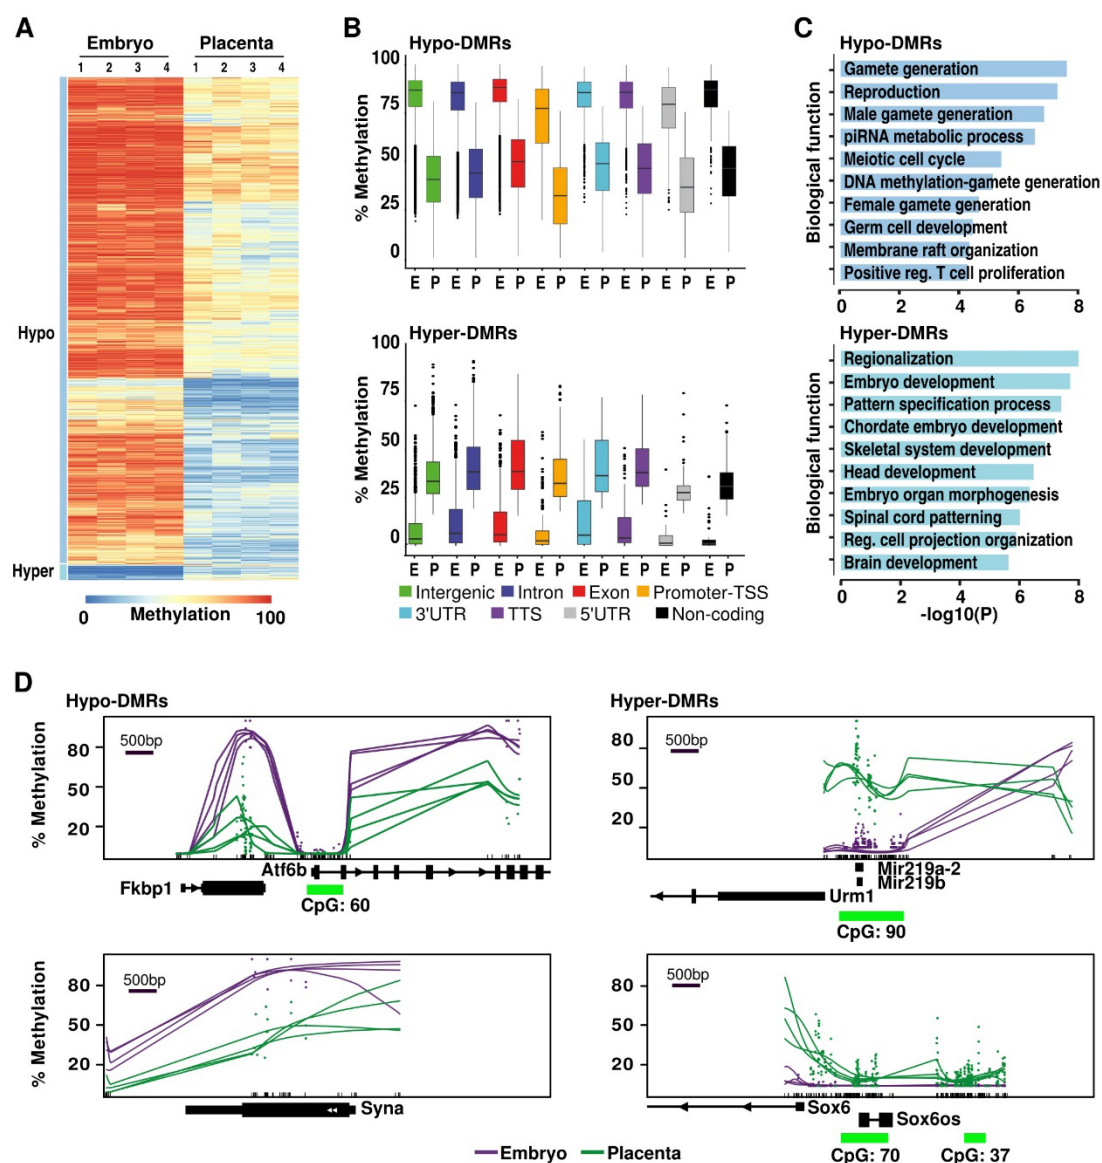

**Figure 2. Genome-wide methylation asymmetry across genomic features between embryo and placenta.** Analyses of genome-wide DNA methylation sequencing results for embryo (n=4)

and placenta (n=4) samples. **A)** Heatmap representation of DNA methylation levels for the 20 000 tiles with the most variable levels between embryo and placenta (DNA methylation variance >20% and  $P < 0.05$ ). **B)** Box-plots representing DNA methylation distribution in embryo and placenta for the different genomic annotation regions (intergenic, intron, exon, promoter-TSS, 3'UTR, TTS, 5'UTR and non-coding). **C)** Summary of biological functions associated with promoter regions in Hypo- and Hyper-DMRs. **D)** Examples of smoothed methylation profiles (*BSmooth* tool) in regions with lower methylation profiles (*Atf6b*, and *Syna*) or higher methylation profiles (*Mir219a-2/Mir219b*, and *Sox6*) in placenta.

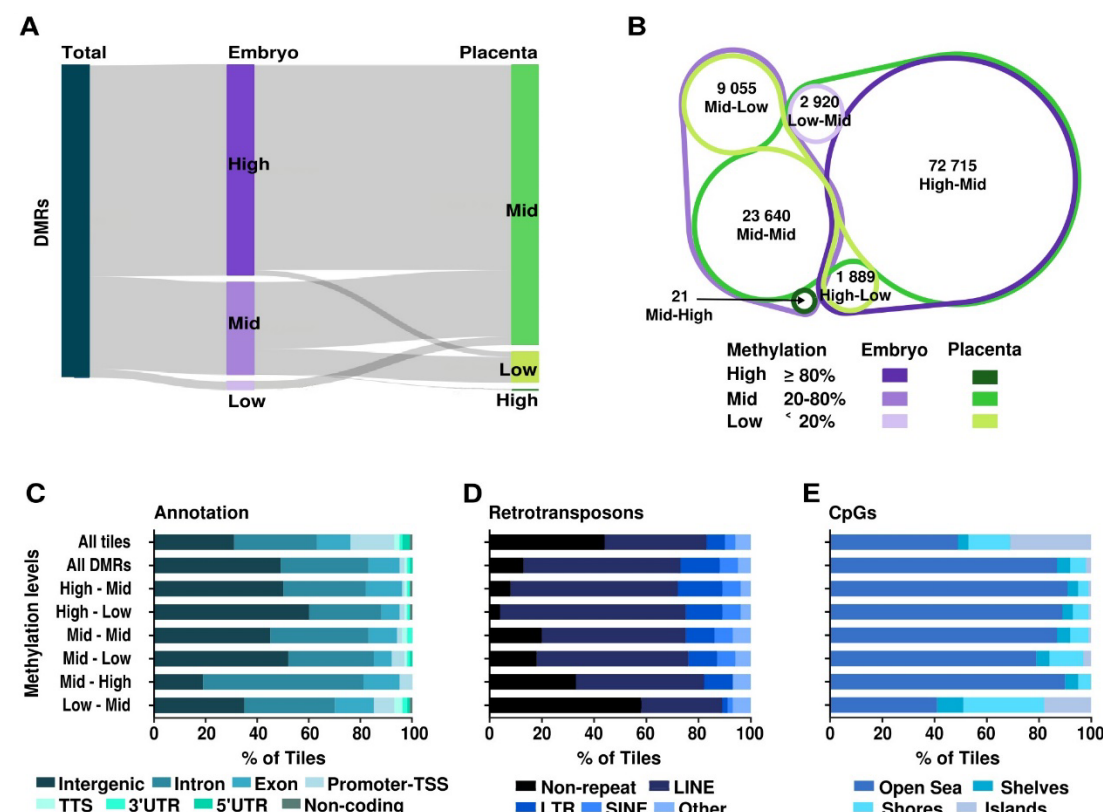

**Figure 3. Distinct genomic features in DMRs based on their methylation status in embryo and placenta.** DMR analysis by methylation levels in embryo and placenta. **A)** Sankey diagram dividing DMRs by methylation levels in embryo (*purple*) and placenta (*green*) for the associated tiles. High :  $\geq 80\%$  methylation, Mid (intermediate) :  $\geq 20\% - < 80\%$  methylation, Low :  $< 20\%$  methylation. **B)** Venn diagram showing the proportion of tiles in the different DMR categories based on DNA methylation levels between embryo and placenta. **C), D)** and **E)** Analysis of all tiles, all the DMRs, as well as the 6 different DMR categories based on levels of DNA methylation in embryo and placenta for : **C)** Genomic annotations, **D)** Main retrotransposons and **E)** Proximity of CpG rich regions. Neighboring CpG dense regions were defined as shore; up to 2kb away from CGIs, shelf; 2-4kb away from CGIs, and open sea; >4kb away from CGIs.

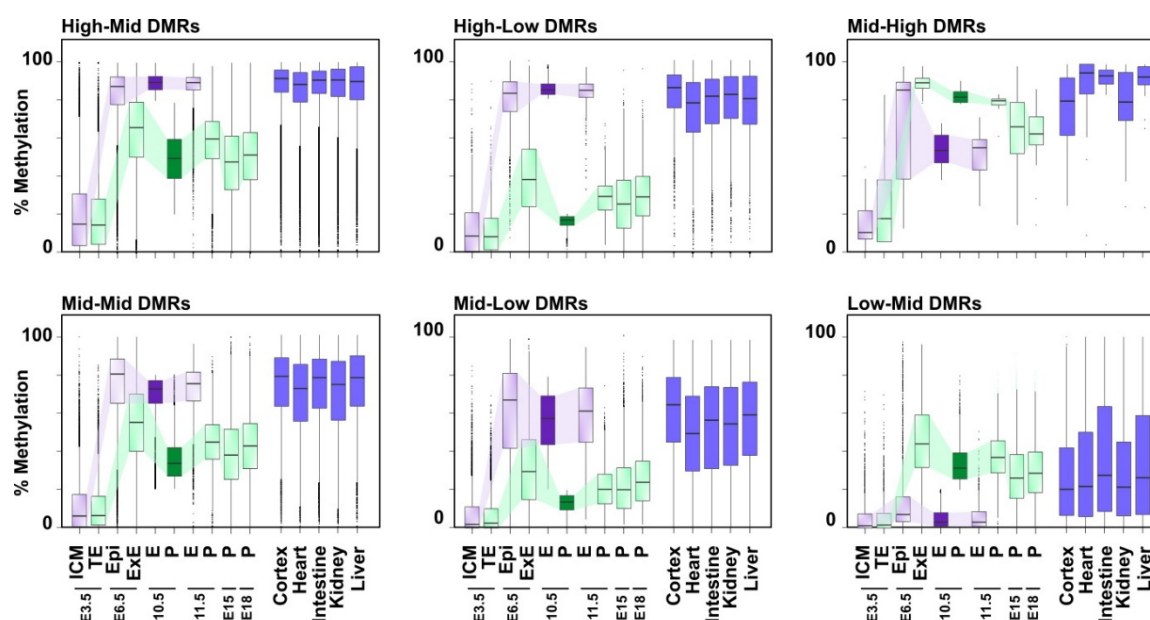

**Figure 4. Dynamics of DNA methylation profiles associated with DMR categories and their evolution across embryo and placenta development.** Box plots representing the DNA methylation distribution and median values for each DMR category in various developmental stages. Tiles associated with DMR categories at E10.5 were overlapped with previously published and publicly available data, and methylation levels were determined at each developmental stage (Smith et al 2012, Smith et al. 2014, Whidden et al. 2016) or in adult somatic tissues (Hon et al. 2013). ICM: inner cell mass, TE: trophectoderm, Epi: epiblast, ExE: extraembryonic ectoderm, E: embryo, Pla: placenta. See Table S2 for median and mean methylation values, and Table S4 for number of overlapping tiles analysed.



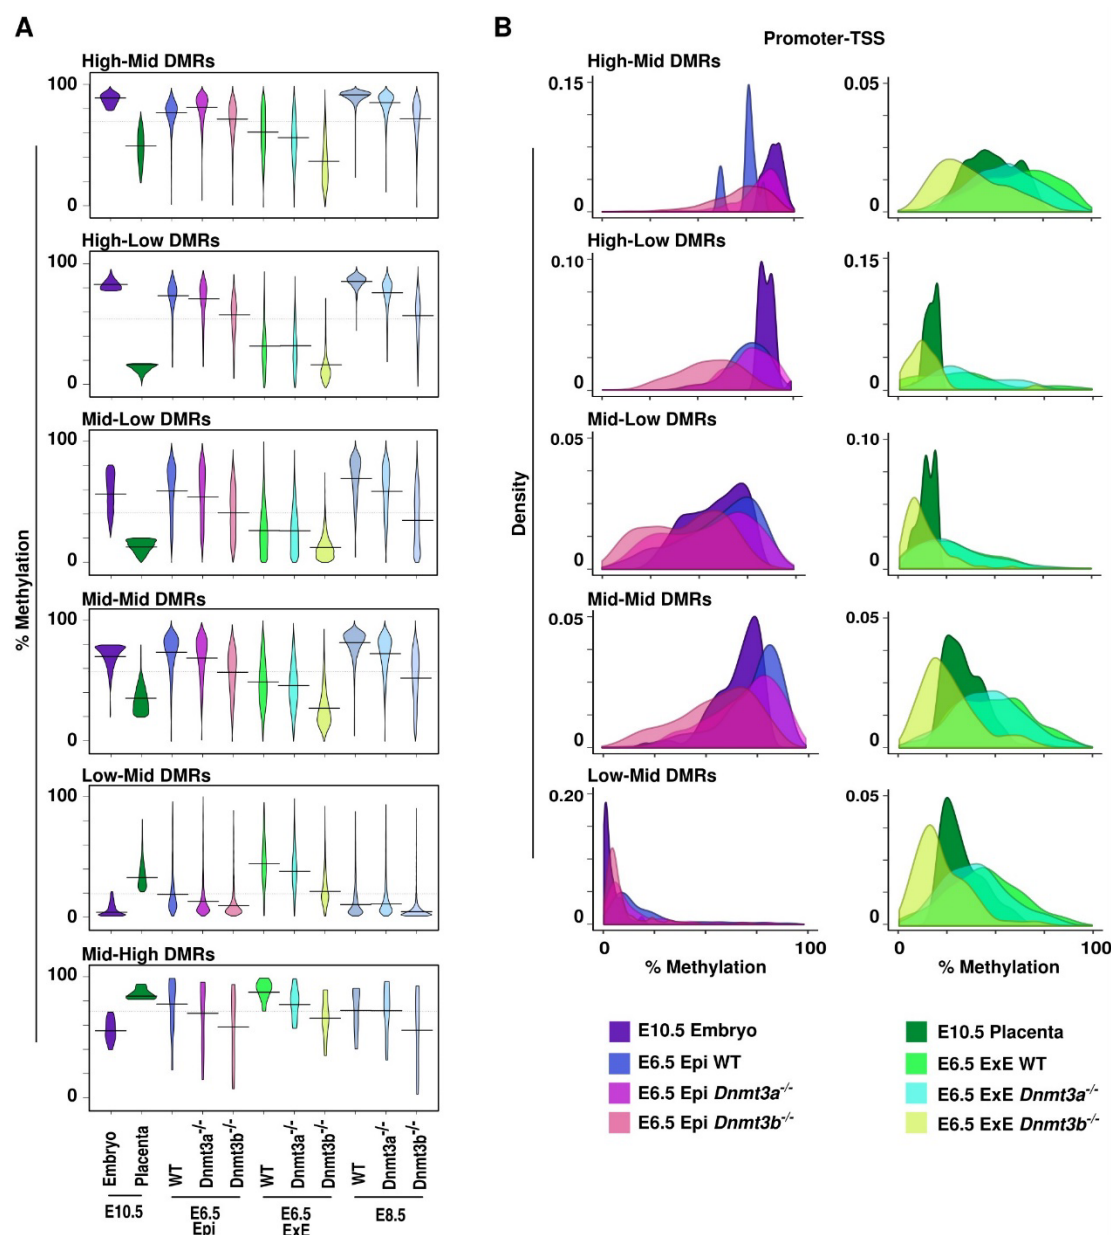

**Figure 5. *Dnmt3a*- or *Dnmt3b*-deficiency alter proper establishment of DMR-associated patterns.** **A)** Violin plot representing DNA methylation distribution and median values of tiles associated with the different DMR categories at E10.5, and their methylation levels in the different tissues and genotypes at E6.5 and E8.5. **B)** Promoter-TSS density graphs for E10.5 embryo and E6.5 epiblast (wt, *Dnmt3a*<sup>-/-</sup> and *Dnmt3b*<sup>-/-</sup>) (left panel) and for E10.5 placenta and E6.5 extraembryonic ectoderm (wt, *Dnmt3a*<sup>-/-</sup> and *Dnmt3b*<sup>-/-</sup>) (right panel). E: embryo, Epi: epiblast, ExE: extraembryonic ectoderm. See Table S3 for median and mean methylation values, and Table S4 for number of overlapping tiles analysed.

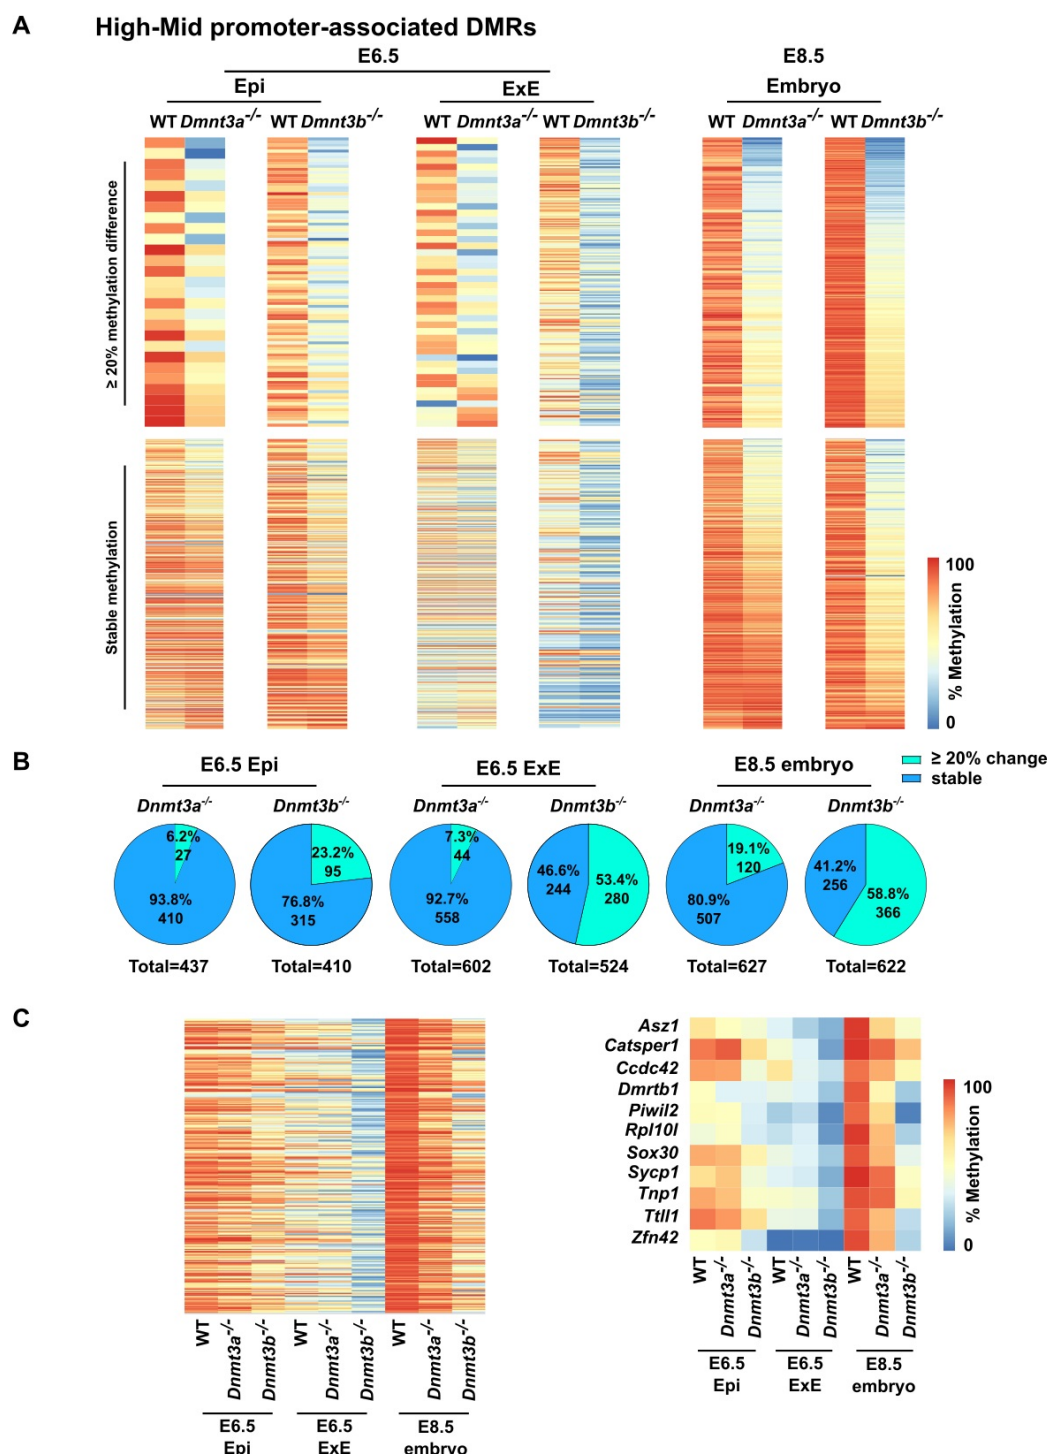

**Figure 6. Developmental decline in compensatory DNA methylation mechanism in response to *Dnmt3a*- or *Dnmt3b*-deficiency at promoter-TSS associated with High-Mid DMRs.** A) Heatmaps comparing the DNA methylation profiles of wt vs *Dnmt3a*<sup>-/-</sup> or wt vs *Dnmt3b*<sup>-/-</sup> for E6.5 epiblast, E6.5 extraembryonic ectoderm or E8.5 embryo in 100bp tiles overlapping promoter-associated DMRs that are highly methylated in the embryo (≥80%) and mildly methylated in the placenta (≥20 and <80%). Upper panel represents regions with a difference of methylation of at least 20% between wt and *Dnmt3a*<sup>-/-</sup> or wt and *Dnmt3b*<sup>-/-</sup>. Lower panel

represents stable regions (lower than 20% difference in methylation). **B)** Pie charts representing DMR numbers for each comparison. **C)** Heatmap of the methylation levels of tiles commonly represented in all 9 public data samples that overlap with promoters-associated High-Mid DMRs (n = 314 tiles) (left panel). Heatmap of the methylation level of gene associated with piRNA, gamete generation and germ cells or meiotic nuclear division that are covered in all 9 public datasets (right panel).
